# Supplementary material
Source: HighWire-hosted journal article supplement (https://gut.bmj.com/content/71/6/1231)

Supplementary figure 2

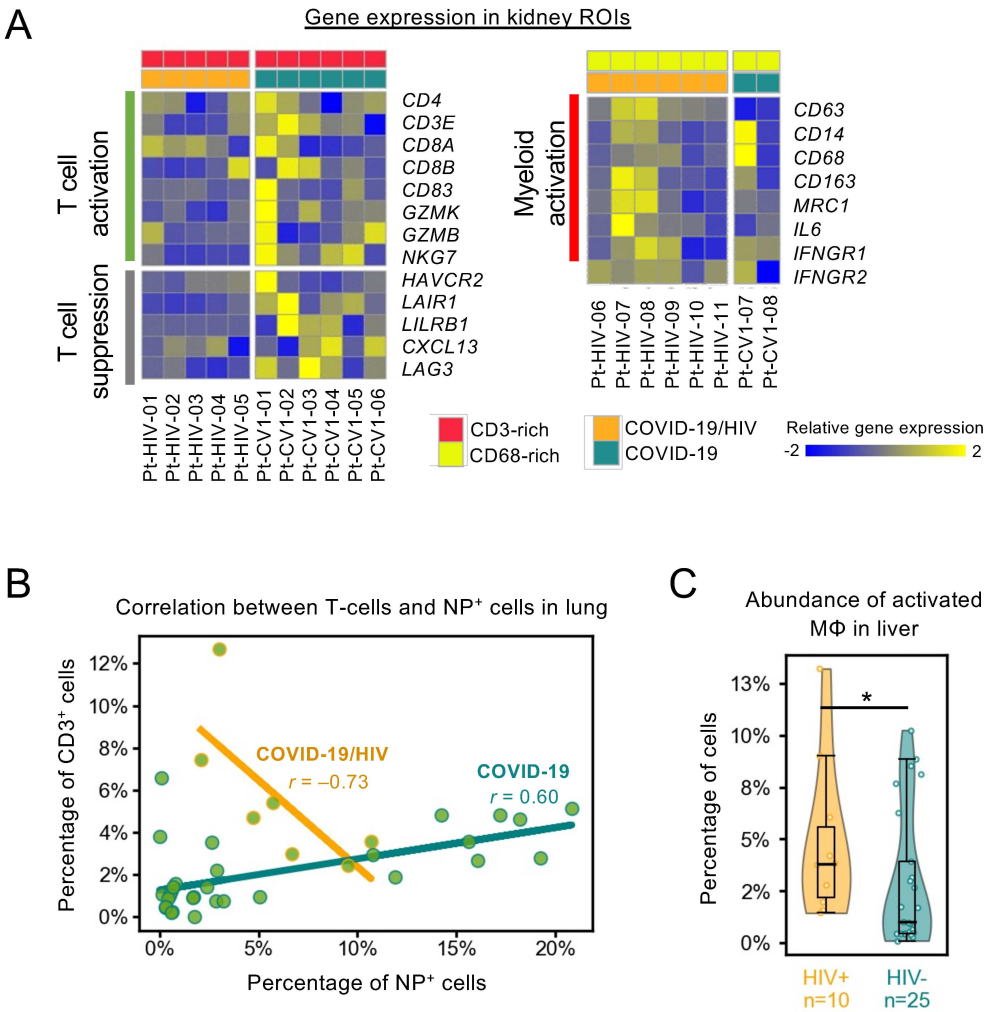

Supplement: inline-supplementary-material-3 [file inline-supplementary-material-3.pdf]
